# Supplementary material
Source: Research Square preprint supplement (doi:10.21203/rs.3.rs-9640458/v1)
Supplement: Supplementary file 1 [file 14b36e9b411ae8dd01152084.docx]

Table 2. Multivariable logistic regression analysis of 30-day mortality: adjusted odds ratios with 2017 as reference year (adjusted for age, sex, ISS, ASA score, and injury type)

|  | **OR*** | **95% CI** | **P** |
| --- | --- | --- | --- |
| **Year of admission** |  |  |  |
| 2017 | 1.00 | Reference |  |
| 2018 | 0.80 | 0.54–1.21 | 0.293 |
| 2019 | 0.85 | 0.57–1.27 | 0.429 |
| 2020 | 0.78 | 0.53–1.15 | 0.214 |
| 2021 | 0.61 | 0.40–0.91 | **0.016** |
| 2022–2023 | 0.61 | 0.43–0.88 | **0.008** |

*Year of admission as categorical predictor (reference: 2017).*

**Adjusted for age, sex, ISS, ASA score and injury type (penetrating/blunt).*

OR, odds ratio; CI, confidence interval. Significant P-values (<0.05) in bold.
