# Supplementary material
Source: Research Square preprint supplement (doi:10.21203/rs.3.rs-9640458/v1)
Supplement: Supplementary file 2 [file 17a7aa320b4a1f7b7ca97fef.docx]

**Supplementary Materials**

*Trauma care performance and patient outcomes – insights from a major trauma center in Sweden*

**Supplementary Table 1**

*Patient characteristics by year of admission*

Patient demographics, injury characteristics, prehospital care, and outcomes stratified by year of admission (2017–2023, with 2022 and 2023 combined). P-values from chi-squared test for categorical variables and Kruskal-Wallis test for continuous variables.

**Supplementary Figure 1**

*Number of trauma patients by age and Injury Severity Score*

Stacked area graph showing the number of trauma patients admitted during the study period (y-axis) over different ages (x-axis), divided by Injury Severity Score categories (ISS 0–15, 16–25, 26–35, 36–75). File format: .tif

**Supplementary Figure 2**

*Median time from arrival to the trauma unit until first emergency procedure*

Median time in minutes (y-axis) from arrival at the trauma unit until the first emergency procedure (damage control thoracotomy or laparotomy, extraperitoneal pelvic packing, limb revascularisation, interventional radiology, craniotomy, or intracranial pressure device insertion) for each year during the study period (x-axis). File format: .tif

**Supplementary Figure 3**

*Prehospital times and physician field care*

Time from alarm to arrival at trauma unit (minutes, median), time from arrival at trauma scene to arrival at trauma unit (minutes, median), time from arrival at trauma scene to departure from trauma scene (minutes, median), and proportion of patients receiving physician field care (percent) for each year during the study period. File format: .tif

**Supplementary Figure 4**

*Median time from arrival to the trauma unit until CT for patients with ISS >15*

Median time in minutes (y-axis) from arrival at the trauma unit until CT initiation for patients with Injury Severity Score >15 (major trauma), with interquartile range. The x-axis represents each year during the study period. This sensitivity analysis was performed to assess whether temporal changes in time to CT were consistent in the most severely injured patients. File format: .tif
