# Supplementary material
Source: Research Square preprint supplement (doi:10.21203/rs.3.rs-9640458/v1)
Supplement: Supplementary file 3 [file 4f3edd9e4fae1cb25fa77ac4.docx]

Table 1. Characteristics of the study cohort.

| **Count** | 5,615 |
| --- | --- |
| **Age, median (IQR)** | 41 (26–59) |
| **Male, count (%)** | 4,125 (73.5) |
| **ASA score, count (%)**  ASA 1  ASA 2  ASA 3  ASA 4 | 3,141 (56.1)  1,447 (25.8)  982 (17.5)  33 (0.6) |
| **Injury mechanism, count (%)**  Traffic  Motor vehicle accident  Motorcycle accident  Bicycle accident  Pedestrian  Traffic other  Gunshot  Stab wound  Struck by blunt object  Low energy fall  High energy fall  Blast injury  Other | 663 (11.8)  391 (7.0)  416 (7.4)  180 (3.2)  63 (1.1)  315 (5.6)  1,002 (17.9)  571 (10.2)  621 (11.1)  1,238 (22.1)  34 (0.6)  101 (1.8) |
| **Injury type, count (%)**  Penetrating  Blunt | 1,324 (23.6)  4,291 (76.4) |
| **Injury intention, count (%)**  Accident  Self-inflicted  Assault  Other | 3,723 (66.8)  580 (10.4)  1,254 (22.5)  14 (0.3) |
| **Care level at scene, count (%)**  No field care  Basic life support  ALS – no physician  ALS – physician field care | 83 (1.5)  1 (0.0)  3,613 (64.3)  1,421 (25.3) |
| **Transportation type, count (%)**  Ground ambulance  Helicopter ambulance  Other or missing | 3,899 (69.4)  1,136 (20.2)  580 (10.3) |
| **Intubated before hospital arrival, count (%)** | 289 (5.1) |
| **GCS on arrival, count (%)**  14–15  9–13  3–8 | 4,076 (81.9)  589 (11.8)  309 (6.2) |
| **ISS categories, count (%)**  ≤ 15  16–25  26–35  36–75 | 3,808 (67.9)  949 (16.9)  519 (9.3)  332 (5.9) |
| **Serious injury by body region, count (%)**  Head*  Face*  Neck*  Thoracic*  Abdominal*  Spinal*  Lower extremity*  Upper extremity* | 1,180 (21.0)  133 (2.4)  64 (1.1)  1,384 (24.6)  561 (10.0)  527 (9.4)  831 (14.8)  218 (3.9) |
| **Shock on arrival**, count (%)** | 493 (7.1) |
| **Massive transfusion***, count (%)** | 369 (7.0) |
| **Highest care level, count (%)**  Emergency department  General ward  Operating theatre  High dependency unit  Intensive care unit | 375 (6.7)  2,399 (42.7)  1,149 (20.5)  268 (4.8)  1,424 (25.4) |
| **Hospital length of stay, count (%)**  0–2 days  3–7 days  >7 days | 2,472 (44.0)  1,717 (30.6)  1,426 (25.4) |
| **GOS at discharge, count (%)**  1  2  3  4  5 | 438 (7.8)  10 (0.2)  1,558 (27.7)  1,851 (33.0)  1,758 (31.3) |
| **30-day mortality, count (%)** | 483 (8.7) |

Continuous data presented as median (IQR). Categorical data as n (%). *AIS >2. **SAP <90 mmHg. ***>10 units pRBC in 24h or >4 units in 1h. AIS, Abbreviated Injury Scale; ALS, advanced life support; ASA, American Society of Anesthesiologists; GCS, Glasgow Coma Scale; GOS, Glasgow Outcome Scale; ISS, Injury Severity Score; SAP, systolic arterial pressure.

*Missing data: ASA n=12, ISS n=7, GCS n=641 (11.4%), SAP n=101 (1.8%), 30-day mortality n=38 (0.7%). All other variables complete.*
