# Supplementary material
Source: Research Square preprint supplement (doi:10.21203/rs.3.rs-9640458/v1)
Supplement: Supplementary file 4 [file dce376df760ade06561093ef.docx]

|  | **2017** | **2018** | **2019** | **2020** | **2021** | **2022–2023** |
| --- | --- | --- | --- | --- | --- | --- |
|  | **N=815** | **N=817** | **N=815** | **N=937** | **N=925** | **N=1,306** |
| **Female sex** | 212 (26.0) | 217 (26.6) | 207 (25.4) | 238 (25.4) | 233 (25.2) | 383 (29.3) |
| **Age, median (IQR)** | 40 (26–57) | 39 (27–57) | 39 (25–59) | 40 (26–58) | 41 (27–59) | 43 (27–61) |
| **ASA score** |  |  |  |  |  |  |
| 1 | 490 (60.3) | 496 (60.8) | 486 (60.1) | 554 (59.3) | 530 (57.4) | 585 (44.8) |
| 2 | 218 (26.8) | 191 (23.4) | 182 (22.5) | 208 (22.2) | 224 (24.2) | 424 (32.5) |
| 3 | 102 (12.5) | 125 (15.3) | 138 (17.1) | 169 (18.1) | 166 (18.0) | 282 (21.6) |
| 4 | 3 (0.4) | 4 (0.5) | 3 (0.4) | 4 (0.4) | 4 (0.4) | 15 (1.1) |
| **ISS category** |  |  |  |  |  |  |
| 0–15 | 539 (66.3) | 560 (68.5) | 562 (69.0) | 669 (71.4) | 646 (69.8) | 832 (64.0) |
| 16–25 | 139 (17.1) | 142 (17.4) | 126 (15.5) | 136 (14.5) | 151 (16.3) | 255 (19.6) |
| 26–35 | 73 (9.0) | 69 (8.4) | 81 (9.9) | 84 (9.0) | 80 (8.6) | 132 (10.1) |
| 36–75 | 62 (7.6) | 46 (5.6) | 46 (5.6) | 48 (5.1) | 48 (5.2) | 82 (6.3) |
| **Blunt trauma** | 641 (78.7) | 640 (78.3) | 598 (73.4) | 709 (75.7) | 715 (77.3) | 988 (75.7) |
| **GCS on arrival** |  |  |  |  |  |  |
| 14–15 | 569 (80.5) | 588 (81.9) | 588 (83.8) | 702 (83.3) | 712 (84.2) | 917 (79.2) |
| 9–13 | 88 (12.4) | 85 (11.8) | 73 (10.4) | 96 (11.4) | 91 (10.8) | 156 (13.5) |
| 3–8 | 50 (7.1) | 45 (6.3) | 41 (5.8) | 45 (5.3) | 43 (5.1) | 85 (7.3) |
| **SAP >90 mmHg** | 741 (93.0) | 754 (93.8) | 729 (91.7) | 861 (92.6) | 855 (93.8) | 1,182 (92.6) |
| **Prehospital intubation** | 48 (5.9) | 49 (6.0) | 65 (8.0) | 40 (4.3) | 29 (3.1) | 58 (4.4) |
| **Physician field care** | 47 (5.8) | 167 (20.4) | 297 (36.4) | 264 (28.2) | 244 (26.4) | 402 (30.8) |
| **Massive transfusion** | 27 (4.4) | 40 (5.3) | 66 (8.9) | 68 (7.3) | 62 (6.7) | 106 (8.3) |
| **30-day mortality** | 86 (10.6) | 67 (8.3) | 76 (9.4) | 77 (8.2) | 65 (7.0) | 112 (8.7) |

Continuous data as median (IQR). Categorical data as n (%). Years 2022 and 2023 combined.
